# Supplementary material for: Prevalence and causes of ocular disorders and visual impairment among preterm children in Ethiopia
Source: PubMed Central journal article supplement (PMC10860044; doi:10.1136/bmjpo-2023-002317), 2024-02-07
Supplement: bmjpo-2023-002317.reviewer_comments.pdf [file bmjpo-2023-002317.reviewer_comments.pdf]

## PEER REVIEW HISTORY

BMJ Paediatrics Open publishes all reviews undertaken for accepted manuscripts. Reviewers are asked to complete a checklist review form and are provided with free text boxes to elaborate on their assessment. These free text comments are reproduced below.

### ARTICLE DETAILS

|                            |                                                                                                    |
|----------------------------|----------------------------------------------------------------------------------------------------|
| <b>TITLE (PROVISIONAL)</b> | Prevalence and causes of ocular disorders and visual impairment among preterm children in Ethiopia |
| <b>AUTHORS</b>             | SHERIEF, SADIK TAJU<br>Muhe, Lulu M<br>Mekasha, Amha<br>Demtse, Asrat<br>Ali, Asim                 |

### VERSION 1 – REVIEW

|                        |                                                                                   |
|------------------------|-----------------------------------------------------------------------------------|
| <b>REVIEWER</b>        | Dr. Dupe Ademola-Popoola<br>University of Ilorin Teaching Hospital, Ophthalmology |
| <b>REVIEW RETURNED</b> | 21-Nov-2023                                                                       |

|                         |                                                            |
|-------------------------|------------------------------------------------------------|
| <b>GENERAL COMMENTS</b> | Kindly look at each of the comments in the main manuscript |
|-------------------------|------------------------------------------------------------|

|                        |                                                                                                                 |
|------------------------|-----------------------------------------------------------------------------------------------------------------|
| <b>REVIEWER</b>        | Frank Martin<br>University of Sydney - Sydney Medical School Nepean, Pediatrics<br>Child Health & Ophthalmology |
| <b>REVIEW RETURNED</b> | 15-Dec-2023                                                                                                     |

|                         |                                                                                                                                                                                                                                                                                                                                                                                                                                                                                          |
|-------------------------|------------------------------------------------------------------------------------------------------------------------------------------------------------------------------------------------------------------------------------------------------------------------------------------------------------------------------------------------------------------------------------------------------------------------------------------------------------------------------------------|
| <b>GENERAL COMMENTS</b> | This is a very valuable study. The data reflects what I would have expected from this population. A follow up prospective study commencing in 5 years time would be of value as I expect the number of surviving very low weight infants (500-750 g ) to significantly increase. The results from this study would be directly comparable to studies from the developed world.<br>This study provides excellent data to use to advocate for a screening program for all low birth babies |
|-------------------------|------------------------------------------------------------------------------------------------------------------------------------------------------------------------------------------------------------------------------------------------------------------------------------------------------------------------------------------------------------------------------------------------------------------------------------------------------------------------------------------|

### VERSION 1 – AUTHOR RESPONSE

Reviewer: 1

Dr. Dupe Ademola-Popoola, University of Ilorin Teaching Hospital  
Comments to the Author

Kindly look at each of the comments in the main manuscript

Excuse me; we didn't get the comments.

Reviewer: 2

Frank Martin, University of Sydney - Sydney Medical School Nepean

**Comments to the Author**

This is a very valuable study. The data reflects what I would have expected from this population. A follow up prospective study commencing in 5 years time would be of value as I expect the number of surviving very low weight infants (500-750 g ) to significantly increase. The results from this study would be directly comparable to studies from the developed world.

This study provides excellent data to use to advocate for a screening program for all low birth babies

Thank you so much for the kind words and positive feedback.

Thank you for the opportunity to be considered for publication in your journal. We look forward to your response.

Sincerely,

Dr. Sadik T. Sherief.
